# Supplementary material for: A multifunctional black phosphorus nanosheet-based immunomagnetic bio-interface for heterogeneous circulating tumor cell capture and simultaneous self-identification in gastric cancer patients
Source: Royal Society of Chemistry journal article supplement (doi:10.1039/d2nr04277k), 2023-01-01
Supplement: d2nr04277k1.pdf [file d2nr04277k1.pdf]

## Supporting Information

### **A multifunctional black phosphorus nanosheets based immunomagnetic bio-interface for heterogenous circulating tumor cell capture and simultaneous self-identification in gastric cancer patients**

Yifan Zuo,<sup>a,‡</sup> Yi Xia,<sup>a,‡</sup> Wenwen Lu,<sup>a,‡</sup> Yue Li,<sup>a</sup> Yang Xiao,<sup>b</sup> Shuai Gao,<sup>a</sup> Zhiyi Zhou,<sup>a</sup> Hao Xu,<sup>a</sup> Xingqing Feng,<sup>a</sup> Chenglin Li,<sup>a,\*</sup> Yanyan Yu <sup>a,\*</sup>

<sup>a</sup> Jiangsu Key Laboratory of New Drug Research and Clinical Pharmacy, Xuzhou Medical University, 209 Tongshan Road, Xuzhou 221004, Jiangsu, P.R.China

<sup>b</sup> School of anesthesiology, Xuzhou Medical University, 209 Tongshan Road, Xuzhou 221004, Jiangsu, P.R.China

## 1. Experimental section

**Synthesis of Fe<sub>3</sub>O<sub>4</sub> particles.** Fe<sub>3</sub>O<sub>4</sub> magnetic nanoparticles were synthesized according to the previous precedures:<sup>1</sup> 1 g PEI and 4 mM Fe(acac)<sub>3</sub> were dissolved in 30 mL DEG, and the solutions was stirred vigorously and heated to 120°C to form a homogeneous dark red solution. Then it was heated to 220°C and kept for 2 h. After cooling to room temperature, the obtained Fe<sub>3</sub>O<sub>4</sub> particles were collected by magnetic separation and rinsed three times with deionized water and ethanol. After drying, 1.0 mg Fe<sub>3</sub>O<sub>4</sub> particles were re-dispersed in 1.0 mL deionized water (1.0 mg/mL) for further use.

**Synthesis of AuNR.** For the synthesis of AuNR, a seed solution needed to be prepared first.<sup>2</sup> 5 mL CTAB solution (0.1 M) and 125 µL HAuCl<sub>4</sub> solution (0.01 M) were added into a 10 mL beaker. The solution was stirred at 600 r/min for 1 min until the color of the solution turned golden brown. Quickly, 300 µL of 0.01 M NaBH<sub>4</sub> was added at 0°C and stirred at 1200 r/min for 2 min. The obtained brown-yellow seed solution was placed in a water bath at 30°C and incubated for 2 h at constant temperature. Then, 0.7 g CTAB and 0.1234 g sodium oleate were dissolved in 25 mL deionized water at 60°C. After cooling to room temperature, 100 µL of 0.01 M AgNO<sub>3</sub> was added and stirred at 600 r/min for 5 min, followed by incubating in a 30°C water bath for another 15 min. 25 mL of 1 mM HAuCl<sub>4</sub> was then added and stirred at 600 r/min on a magnetic agitator for 90 min, during which the solution was changed from golden to colorless, and the pH was adjusted by adding 2.5 mL of 1 M HCl. Then, the mixture was stirred at 400 r/min for 15 min, after which, 80 µL of 0.1 M AA was added. Afterwards, we added 25 µL of the prepared seed solution into the mixture and the solution was stirred at 700 r/min for 1 min and then transferred to a water bath at 30°C for 15-18 h. At this stage, the solution turned purple and the color gradually became darker to obtain the final wine red AuNR. After drying, it was re-dispersed in 1.0 mL deionized water to obtain the final concentration of 20 µg/mL.

**Cell culture.** MGC-803 (human stomach cancer cells), BGC-823 (human stomach cancer cells), THP-1 (human monocytes cells) and Hela cells were cultured in 1640 medium supplemented with 10% fetal bovine serum (FBS) and double antibody (100

U/mL penicillin, 100 U/mL streptomycin) and cultured in a 37°C, 5% CO<sub>2</sub> incubator. MCF-10A cells were grown in DMEM/F12 medium (1: 1, Hyclone, US). All of these cells were provided by Affiliated Hospital of Xuzhou Medical University.

**Biocompatibility evaluations of BP-Fe<sub>3</sub>O<sub>4</sub>-AuNR/Apt probe on CTCs.** Before biocompatibility evaluations, the captured cells needed to be released from the probe. Typically, after MGC-803 and BGC-823 cells were captured, complementary DNA was added for cell release. The released cells were re-collected by centrifugation and resuspended in 2 mL complete medium for reculture in a 37°C, 5% CO<sub>2</sub> incubator for one week. During this period, the medium was changed every two days, and the growth of the cells was observed and recorded every day.

The biocompatibility of the BP-Fe<sub>3</sub>O<sub>4</sub>-AuNR/Apt probe was assessed by CCK-8 assay, Calcein AM and PI stainings and apoptosis assay. Firstly, 0 (control group), 20, 40, 60, 80, and 100 µg/mL of BP-Fe<sub>3</sub>O<sub>4</sub>-AuNR/Apt probe were incubated with MGC-803 and BGC-823 cells for 30 min in the incubator. Then, 100 µL incomplete medium containing 10 µL CCK-8 (2.5 mM) was added and incubated for another 4 h. Finally, the absorbance value (OD) of the 96-well plate was detected at a wavelength of 450 nm using a microplate reader. Cell viability was calculated as: % =  $([OD]_{\text{measurement}} - [OD]_{\text{blank}}) / ([OD]_{\text{control}} - [OD]_{\text{blank}}) \times 100\%$ .

After collecting the released cells, cells were stained with 2 µM Calcein AM and 8 µM PI at room temperature for 30 min, and the number of live and dead cells was counted under microscopy.

Finally, the effect of BP-Fe<sub>3</sub>O<sub>4</sub>-AuNR/Apt probe on cell viability was further investigated by apoptosis assay. Well-grown MGC-803 and BGC-823 cells were seeded in a 6-well plate at a density of  $5 \times 10^5$  cells per well, and incubated for 12 h to make cells adherent. The medium was discarded and cleaned twice with PBS buffer, and then a certain amount of BP-Fe<sub>3</sub>O<sub>4</sub>-AuNR/Apt probe was added. After mixing, 2 mL per well was added to the 6-well plate and incubated for 30 min. Trypsin without EDTA was digested for 5 min and centrifuged for 3 min. The cell pellet was washed twice with PBS and resuspended. Annexin V-FITC (5 µL, 20 µg/mL) and Annexin V-PI (5 µL, 0.1 mg/mL) were added in sequence. Then, the mixture was wrapped in foil and incubated at room temperature for 5~15 min. Apoptosis was detected by flow

cytometry within 1 h.

## 2. Results and discussion

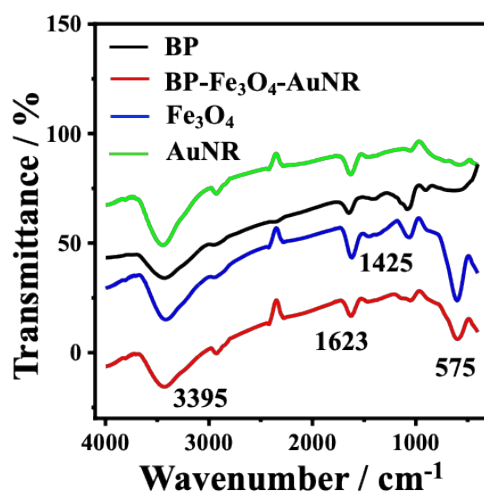

Figure S1. FT-IR absorption spectra of Fe<sub>3</sub>O<sub>4</sub>, BP, AuNR and BP-Fe<sub>3</sub>O<sub>4</sub>-AuNR.

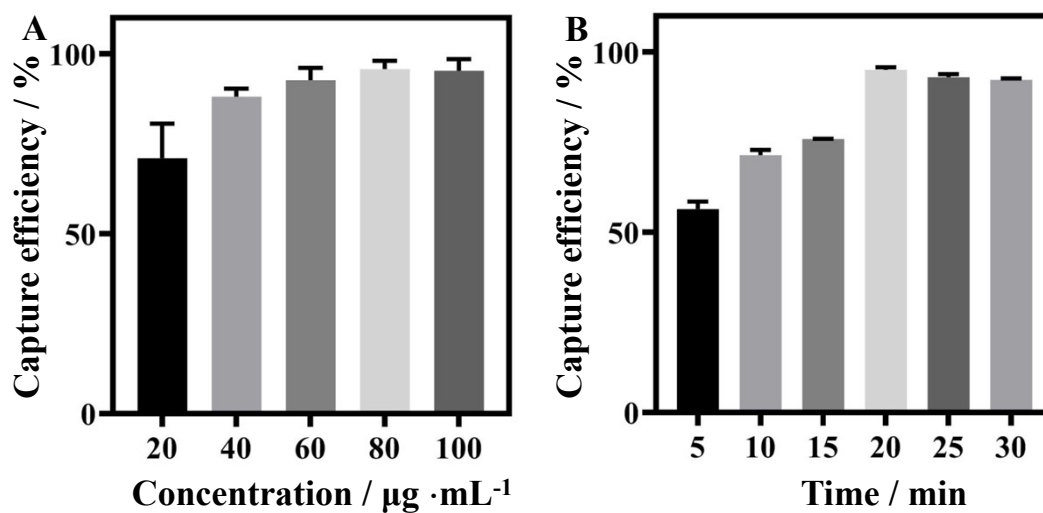

Figure S2. Effects of concentrations of BP-Fe<sub>3</sub>O<sub>4</sub>-AuNR/Apt probe (A) and incubation time (B) on the capture efficiency of MGC-803 cells. Cell concentration: 1000 cells/mL.

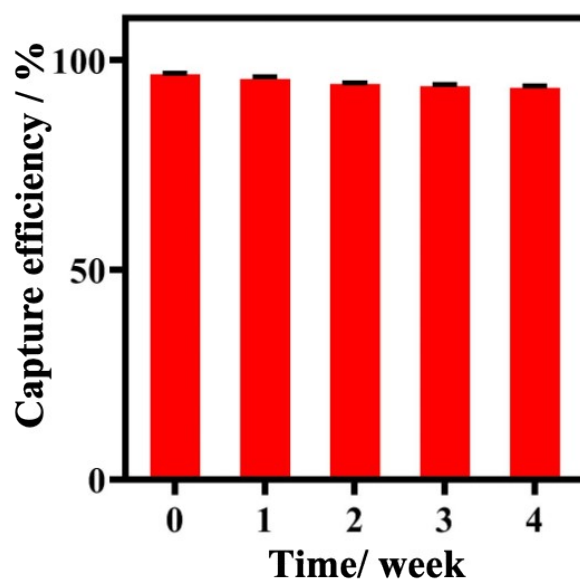

**Figure S3.** Trend of capture efficiency by BP-Fe<sub>3</sub>O<sub>4</sub>-AuNR/Apt probe within 4 weeks.

**Table S1.** Counted cell numbers in three mimic clinical samples (n = 3)

| Sample no | Spiked cell number /mL | Counted cell number/mL |   |    | Mean | RSDs (%) |
|-----------|------------------------|------------------------|---|----|------|----------|
|           |                        | 1                      | 2 | 3  |      |          |
| 1         | 1                      | 1                      | 1 | 0  | 1    | 86.6     |
| 2         | 5                      | 5                      | 4 | 5  | 5    | 12.3     |
| 3         | 10                     | 9                      | 8 | 10 | 9    | 11.1     |

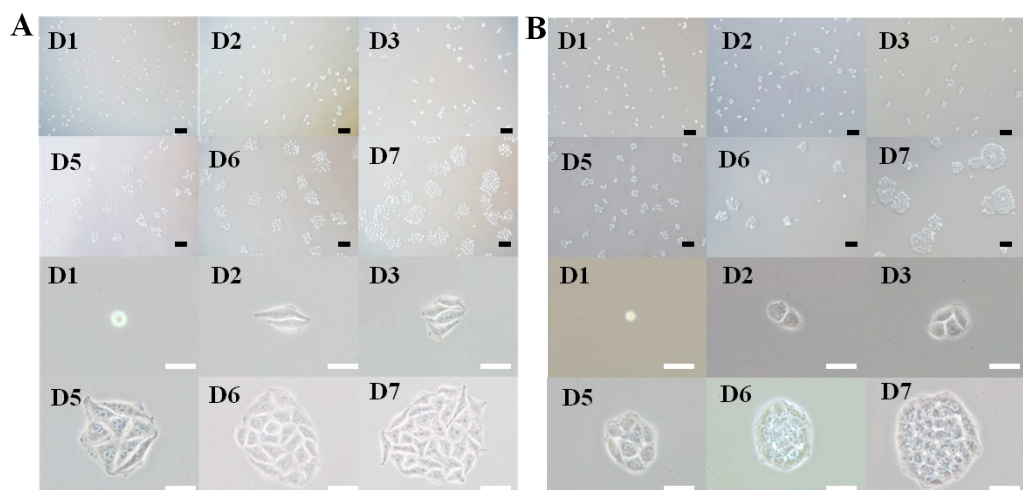

**Figure S4.** Cell re-culture after release. (A) MGC-803 cells; (B) BGC-823 cells. Black scale bars: 100  $\mu\text{m}$ . White scale bars: 20  $\mu\text{m}$ .

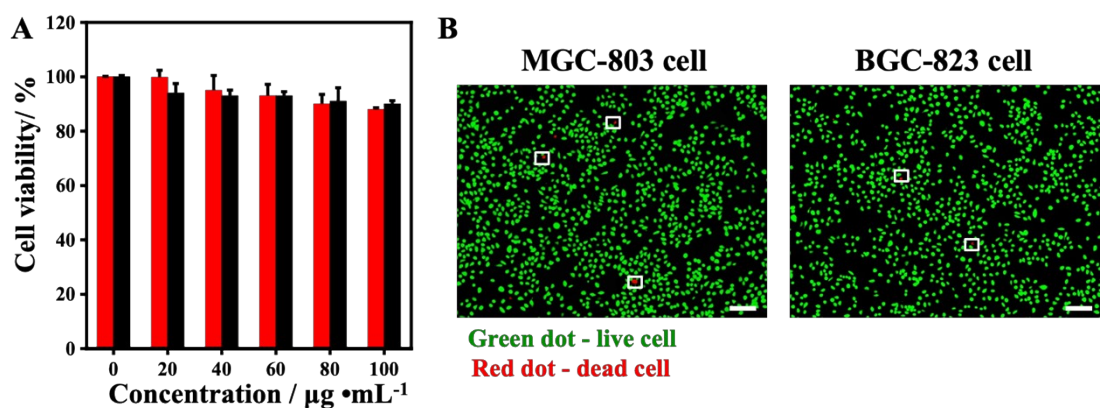

**Figure S5.** (A) Cell survival rate after incubated with 0 ~ 100  $\mu\text{g}/\text{mL}$  BP- $\text{Fe}_3\text{O}_4$ -AuNR/Apt probe. (B) Inverted fluorescence images of live (green dots) and dead cell (red dots) staining of MGC-803 and BGC-823 cells. Scale bars: 100  $\mu\text{m}$ .

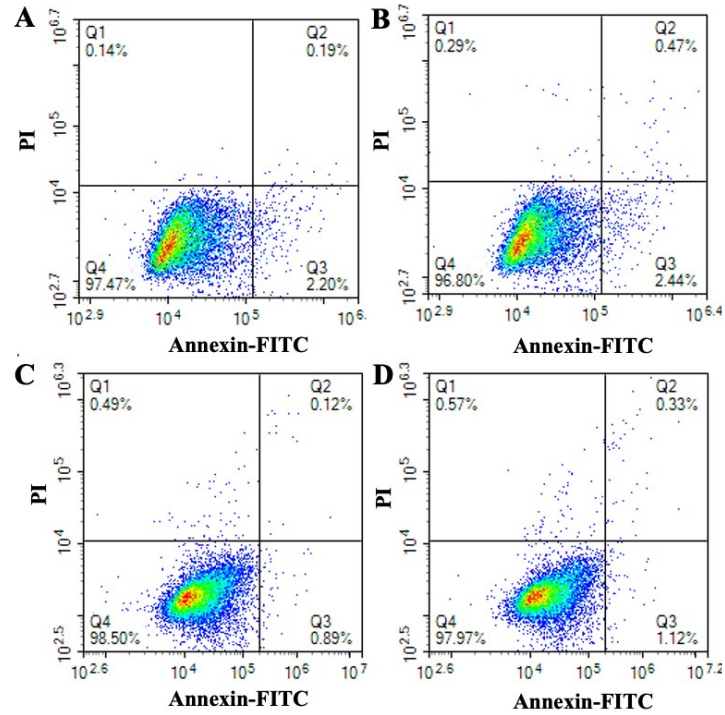

**Figure S6.** Apoptosis diagrams of MGC-803 (A, B) and BGC-823 (C, D) cells in control group (A, C) and experimental group (B, D).

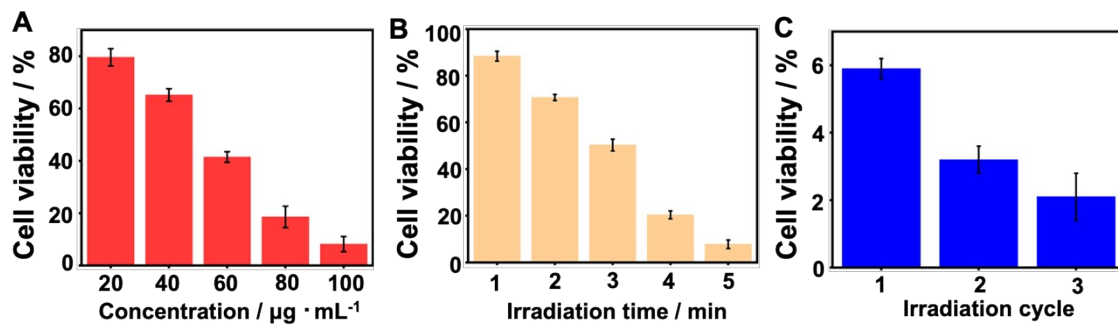

**Figure S7.** Investigations on MGC-803 cell viability during photothermal treatments under different conditions: (A) different concentrations of BP-Fe<sub>3</sub>O<sub>4</sub>-AuNR/Apt probe (20 - 100  $\mu\text{g/mL}$ ) and irradiated for 5 min; (B) different irradiation time (1-5 min) with 100  $\mu\text{g/mL}$  probe. (C) different irradiation cycles with probe concentration of 100  $\mu\text{g/mL}$  and irradiated for 5 min for each cycle. Cell concentration: 500 /mL.

**Table S2** Comparison of our work with other reported technologies in CTCs capture

| Methods         | Capture efficiency (%)              | Linear range (cells/mL) | Incubation time (min) | Heterogenous | Ref |      |
|-----------------|-------------------------------------|-------------------------|-----------------------|--------------|-----|------|
| Nanomaterials   | IMNs                                | > 90                    | 10~300                | 30           | Yes | [3]  |
|                 | BIMNs                               | > 85                    | 20~200                | 2            | No  | [4]  |
|                 | Nanocage                            | > 92                    | 10~4000               | 60           | Yes | [5]  |
|                 | MN@Cys@PE                           | > 90.5                  | 20~300                | 15           | Yes | [6]  |
| Microfluid chip | G2k-FA                              |                         |                       |              |     |      |
|                 | Apt-mAb chip                        | >89                     | 25~10 <sup>4</sup>    | --           | Yes | [7]  |
|                 | AFM chip                            | 97.3                    | 500~5×10 <sup>4</sup> | --           | No  | [8]  |
|                 | ISET                                | > 91                    | 10~100                | --           | No  | [9]  |
| Present study   | VIZA chip                           | 95                      | 2~1200                | --           | Yes | [10] |
|                 | BP-Fe <sub>3</sub> O <sub>4</sub> - | > 95                    | 5~500                 | 20           | Yes | --   |
|                 | AuNR/Apt                            |                         |                       |              |     |      |

**Table S3.** Basic information and number of CTCs in peripheral blood of patients with gastric cancer

| Number | Gender | Age | Stage | Distant metastasis | Volume of blood/mL | Number of CTCs |
|--------|--------|-----|-------|--------------------|--------------------|----------------|
| 1      | female | 85  | I     | 0                  | 1.0                | 3              |
| 2      | male   | 57  | I     | 0                  | 1.0                | 3              |
| 3      | male   | 66  | I     | 0                  | 1.0                | 4              |
| 4      | male   | 68  | I     | 0                  | 1.0                | 3              |
| 5      | male   | 54  | II    | 0                  | 1.0                | 4              |
| 6      | male   | 49  | II    | 0                  | 1.0                | 4              |
| 7      | male   | 58  | II    | 0                  | 1.0                | 6              |
| 8      | male   | 29  | II    | 0                  | 1.0                | 4              |
| 9      | female | 54  | II    | 0                  | 1.0                | 6              |
| 10     | female | 50  | II    | 0                  | 1.0                | 5              |
| 11     | female | 52  | II    | 0                  | 1.0                | 5              |
| 12     | male   | 77  | II    | 0                  | 1.0                | 5              |
| 13     | female | 58  | II    | 0                  | 1.0                | 6              |
| 14     | male   | 72  | II    | 0                  | 1.0                | 4              |
| 15     | female | 70  | II    | 0                  | 1.0                | 5              |
| 16     | male   | 44  | II    | 0                  | 1.0                | 5              |
| 17     | male   | 72  | II    | 0                  | 1.0                | 4              |
| 18     | male   | 57  | II    | 0                  | 1.0                | 3              |
| 19     | male   | 56  | II    | 0                  | 1.0                | 6              |
| 20     | male   | 61  | II    | 0                  | 1.0                | 4              |
| 21     | female | 45  | II    | 0                  | 1.0                | 5              |
| 22     | female | 72  | II    | 0                  | 1.0                | 6              |



| Number | Gender | Age | Stage | Distant metastasis | Volume of blood/mL | Number of CTCs |
|--------|--------|-----|-------|--------------------|--------------------|----------------|
| 23     | male   | 65  | II    | 0                  | 1.0                | 5              |
| 24     | male   | 55  | II    | 0                  | 1.0                | 5              |
| 25     | male   | 68  | II    | 0                  | 1.0                | 5              |
| 26     | female | 54  | II    | 0                  | 1.0                | 5              |
| 27     | male   | 51  | II    | 0                  | 1.0                | 5              |
| 28     | male   | 63  | II    | 0                  | 1.0                | 5              |
| 29     | female | 58  | II    | 0                  | 1.0                | 4              |
| 30     | female | 53  | II    | 0                  | 1.0                | 5              |
| 31     | male   | 68  | II    | 0                  | 1.0                | 6              |
| 32     | female | 52  | II    | 0                  | 1.0                | 4              |
| 33     | male   | 59  | II    | 0                  | 1.0                | 4              |
| 34     | male   | 59  | III   | 0                  | 1.0                | 8              |
| 35     | male   | 86  | III   | 0                  | 1.0                | 9              |
| 36     | female | 58  | III   | 0                  | 1.0                | 8              |
| 37     | male   | 76  | III   | 0                  | 1.0                | 8              |
| 38     | male   | 74  | III   | 0                  | 1.0                | 6              |
| 39     | male   | 55  | III   | 0                  | 1.0                | 7              |
| 40     | male   | 53  | III   | 0                  | 1.0                | 8              |
| 41     | male   | 56  | III   | 0                  | 1.0                | 7              |
| 42     | male   | 63  | III   | 0                  | 1.0                | 8              |
| 43     | female | 74  | III   | 0                  | 1.0                | 8              |
| 44     | male   | 52  | III   | 0                  | 1.0                | 7              |
| 45     | male   | 69  | III   | 0                  | 1.0                | 8              |
| 46     | female | 71  | III   | 0                  | 1.0                | 9              |
| 47     | male   | 64  | III   | 0                  | 1.0                | 7              |
| 48     | male   | 37  | III   | 0                  | 1.0                | 8              |
| 49     | female | 50  | III   | 0                  | 1.0                | 8              |
| 50     | female | 73  | III   | 0                  | 1.0                | 7              |
| 51     | female | 65  | III   | 0                  | 1.0                | 7              |
| 52     | male   | 70  | III   | 0                  | 1.0                | 7              |
| 53     | female | 33  | III   | 0                  | 1.0                | 7              |
| 54     | female | 52  | III   | 0                  | 1.0                | 5              |
| 55     | male   | 59  | III   | 0                  | 1.0                | 8              |
| 56     | male   | 50  | III   | 0                  | 1.0                | 6              |
| 57     | male   | 52  | III   | 0                  | 1.0                | 8              |
| 58     | male   | 76  | III   | 0                  | 1.0                | 6              |
| 59     | female | 65  | III   | 0                  | 1.0                | 8              |
| 60     | male   | 67  | III   | 0                  | 1.0                | 7              |
| 61     | male   | 49  | IV    | 1                  | 1.0                | 12             |
| 62     | male   | 50  | IV    | 1                  | 1.0                | 9              |
| 63     | male   | 58  | IV    | 1                  | 1.0                | 10             |
| 64     | male   | 60  | IV    | 1                  | 1.0                | 12             |
| 65     | male   | 66  | IV    | 1                  | 1.0                | 10             |

| Number | Gender | Age | Stage | Distant metastasis | Volume of blood/mL | Number of CTCs |
|--------|--------|-----|-------|--------------------|--------------------|----------------|
| 66     | male   | 61  | IV    | 1                  | 1.0                | 9              |
| 67     | female | 46  | IV    | 1                  | 1.0                | 9              |
| 68     | male   | 57  | IV    | 1                  | 1.0                | 8              |
| 69     | male   | 69  | IV    | 1                  | 1.0                | 9              |
| 70     | female | 80  | IV    | 1                  | 1.0                | 12             |

**Table S4.** Basic information and number of CTCs in peripheral blood of patients with gastric adenocarcinoma (GA) before and after one cycle of chemotherapy

| Number | Cancer | Gender | Age | Volume of blood/mL | Number of CTCs   |                              |
|--------|--------|--------|-----|--------------------|------------------|------------------------------|
|        |        |        |     |                    | Before treatment | After one cycle of treatment |
| 1      | GA     | female | 50  | 1.0                | 8                | 7                            |
| 2      | GA     | male   | 70  | 1.0                | 7                | 5                            |
| 3      | GA     | male   | 68  | 1.0                | 6                | 4                            |
| 4      | GA     | male   | 59  | 1.0                | 4                | 5                            |
| 5      | GA     | female | 53  | 1.0                | 5                | 3                            |
| 6      | GA     | female | 80  | 1.0                | 12               | 6                            |
| 7      | GA     | male   | 68  | 1.0                | 5                | 3                            |
| 8      | GA     | male   | 76  | 1.0                | 6                | 5                            |
| 9      | GA     | male   | 63  | 1.0                | 5                | 3                            |
| 10     | GA     | male   | 55  | 1.0                | 5                | 4                            |
| 11     | GA     | male   | 59  | 1.0                | 8                | 6                            |
| 12     | GA     | female | 73  | 1.0                | 7                | 5                            |
| 13     | GA     | female | 54  | 1.0                | 5                | 4                            |
| 14     | GA     | female | 52  | 1.0                | 4                | 3                            |
| 15     | GA     | male   | 65  | 1.0                | 5                | 4                            |
| 16     | GA     | female | 33  | 1.0                | 7                | 5                            |
| 17     | GA     | male   | 51  | 1.0                | 5                | 3                            |
| 18     | GA     | male   | 66  | 1.0                | 4                | 3                            |
| 19     | GA     | male   | 69  | 1.0                | 9                | 7                            |
| 20     | GA     | female | 65  | 1.0                | 8                | 6                            |
| 21     | GA     | female | 65  | 1.0                | 7                | 6                            |
| 22     | GA     | female | 52  | 1.0                | 5                | 4                            |
| 23     | GA     | male   | 50  | 1.0                | 6                | 5                            |
| 24     | GA     | male   | 52  | 1.0                | 8                | 6                            |
| 25     | GA     | female | 58  | 1.0                | 4                | 3                            |
| 26     | GA     | male   | 68  | 1.0                | 3                | 2                            |

**Table S5.** Basic information and number of CTCs in peripheral blood of patients with gastric adenocarcinoma (GA) before and after two cycle of chemotherapy

| Number | Cancer | Gender | Age | Volume of blood/mL | Number of CTCs   |                               |
|--------|--------|--------|-----|--------------------|------------------|-------------------------------|
|        |        |        |     |                    | Before treatment | After two cycles of treatment |
| 1      | GA     | female | 33  | 1.0                | 7                | 5                             |
| 2      | GA     | male   | 52  | 1.0                | 8                | 4                             |
| 3      | GA     | male   | 51  | 1.0                | 5                | 2                             |
| 4      | GA     | male   | 66  | 1.0                | 4                | 3                             |
| 5      | GA     | male   | 69  | 1.0                | 9                | 7                             |
| 6      | GA     | female | 65  | 1.0                | 8                | 4                             |
| 7      | GA     | male   | 68  | 1.0                | 3                | 2                             |
| 8      | GA     | female | 65  | 1.0                | 7                | 6                             |
| 9      | GA     | female | 58  | 1.0                | 4                | 3                             |
| 10     | GA     | male   | 50  | 1.0                | 6                | 4                             |
| 11     | GA     | female | 52  | 1.0                | 5                | 3                             |

**Table S6.** Basic information of patients with benign gastric disease and the number of CTCs in peripheral blood

| Number | Disease                    | Gender | Age | Volume of blood/mL | Number of CTCs |
|--------|----------------------------|--------|-----|--------------------|----------------|
| 1      | chronic atrophic gastritis | male   | 77  | 1.0                | 0              |
| 2      | chronic atrophic gastritis | male   | 65  | 1.0                | 0              |
| 3      | chronic atrophic gastritis | male   | 64  | 1.0                | 0              |
| 4      | chronic atrophic gastritis | male   | 21  | 1.0                | 0              |
| 5      | chronic atrophic gastritis | female | 38  | 1.0                | 0              |
| 6      | chronic atrophic gastritis | female | 58  | 1.0                | 0              |
| 7      | chronic atrophic gastritis | female | 76  | 1.0                | 0              |
| 8      | chronic atrophic gastritis | female | 57  | 1.0                | 0              |
| 9      | chronic atrophic gastritis | female | 64  | 1.0                | 0              |
| 10     | chronic atrophic gastritis | male   | 64  | 1.0                | 0              |
| 11     | chronic atrophic gastritis | male   | 51  | 1.0                | 0              |
| 12     | chronic atrophic gastritis | male   | 64  | 1.0                | 0              |
| 13     | chronic atrophic gastritis | male   | 58  | 1.0                | 0              |
| 14     | chronic atrophic gastritis | male   | 70  | 1.0                | 0              |
| 15     | chronic atrophic gastritis | male   | 62  | 1.0                | 0              |

**Table S7.** Basic information of healthy persons and the number of CTCs  
in peripheral blood

| Number | Gender | Age | Volume of blood/mL | Number of CTCs |
|--------|--------|-----|--------------------|----------------|
| 1      | male   | 43  | 1.0                | 0              |
| 2      | male   | 25  | 1.0                | 0              |
| 3      | female | 26  | 1.0                | 0              |
| 4      | female | 48  | 1.0                | 0              |
| 5      | male   | 50  | 1.0                | 0              |

## References

- [1] D. Yang, G. X. Yang, P. P. Yang, R. C. Lv, S. L. Gai, C. X. Li, F. He, J. Lin, Assembly of Au Plasmonic Photothermal Agent and Iron Oxide Nanoparticles on Ultrathin Black Phosphorus for Targeted Photothermal and Photodynamic Cancer Therapy, *Adv Funct Mater* 27 (2017) 1700371.
- [2] Q. H. Shou, M. Ebara, J. Q. Wang, Q. G. Wang, X. F. Liang, H. Z. Liu, T. Aoyagi, Preparation of phase diagram of gold nanorods in mixture solvent of DMSO and water and its application for efficient surface-modification, *Appl Surf Sci* 457 (2018) 264-270.
- [3] X. Y. Ma, L. L. Wu, L. Chen, Y. H. Qin, J. Hu, M. Tang, C. M. Xu, C. B. Qi, Z. L. Zhang, D. W. Pang. Enhanced and High-Purity Enrichment of Circulating Tumor Cells Based on Immunomagnetic Nanospheres, *ACS Applied Nano Materials* 1 (2018), 4019-4027.
- [4] X. Zhou, B. Luo, K. Kang, Y. J. Zhang, P. P. Jiang, F. Lan, Q. Y. Yi, Y. Wu. Leukocyte-Repelling Biomimetic Immunomagnetic Nanoplatform for High-Performance Circulating Tumor Cells Isolation, *Small* 15 (2019) 1900558.
- [5] W. N. Jiang, L. L. Han, L. W. Yang, T. Xu, J. B. He, R. L. Peng, Z. Y. Liu, C. Zhang, X. M. Yu, L. Y. Jia. Natural Fish Trap-Like Nanocage for Label-Free Capture of Circulating Tumor Cells, *Adv Sci* 7 (2020) 2002259.
- [6] F. L. Li, M. N. Wang, H. H. Cai, Y. H. He, H. Y. Xu, Y. Liu, Y. F. Zhao. Nondestructive capture, release, and detection of circulating tumor cells with

- cystamine-mediated folic acid decorated magnetic nanospheres, *J Mater Chem B* 8 (2020) 9971-9979.
- [7] Y. L. Chen, Y. k. Yang, J. L. Feng, A. J. Carrier, D. Tyagi, X. Yu, C. G. Wang, K. D. Oakes, X. Zhang. A Universal Monoclonal Antibody-Aptamer Conjugation Strategy for Selective Non-invasive Bioparticle Isolation from Blood on the Regenerative Microfluidic Platform, *Acta Biomater* 152 (2022) 210-220.
- [8] A. Abdulla, Z. A. A. Zhang, K. Z. Ahmad, A. R. Warden, H. Y. Li, X. T. Ding. Rapid and efficient capturing of circulating tumor cells from breast cancer Patient's whole blood via the antibody functionalized microfluidic (AFM) chip, *Biosens Bioelectron* 201 (2022) 113965.
- [9] N. Sun, X. P. Li, Z. L. Wang, Y. Z. Li, R. J. Pei. High-purity capture of CTCs based on micro-beads enhanced isolation by size of epithelial tumor cells (ISET) method, *Biosens Bioelectron* 102 (2018) 157-163.
- [10] E. A. Kwizera, W. Q. Ou, S. Lee, S. Stewart, J. G. Shamul, J. S. Xu, N. Tait, K. H. R. Tkaczuk, X. M. He. Greatly Enhanced CTC Culture Enabled by Capturing CTC Heterogeneity Using a PEGylated PDMS-Titanium-Gold Electromicrofluidic Device with Glutathione-Controlled Gentle Cell Release, *ACS Nano* 16 (2022) 11374-11391.
